# Supplementary material for: Fast and accurate de novo genome assembly from long uncorrected reads
Source: PubMed Central journal article supplement — Genome Res. 2017 May;27(5):737–46. doi: 10.1101/gr.214270.116 (PMC5411768; doi:10.1101/gr.214270.116), 2017-05
Supplement: supp_gr.214270.116_Supplemental_Table_S1.pdf [file supp_gr.214270.116_Supplemental_Table_S1.pdf]

**Supplemental Table S1. Comparison of Racon consensus with overlapping windows (ovl) and the default Racon consensus with non-overlapping windows.** In the default version windows are of length 500bp. For the overlap version, every window is extended by 10% on each of its ends, causing a 100bp overlap with the previous/next window.

|                               |                       | Miniasm+Racon<br>1 iteration | Miniasm+Racon<br>2 iterations | Miniasm+Racon ovl.<br>1 iteration | Miniasm+Racon ovl.<br>2 iterations |                    |
|-------------------------------|-----------------------|------------------------------|-------------------------------|-----------------------------------|------------------------------------|--------------------|
| <i>Lambda</i>                 | Ref. genome size [bp] | 48502                        | 48502                         | 48502                             | 48502                              |                    |
|                               | Total bases [bp]      | 47916                        | 47872                         | 47852                             | 47856                              |                    |
|                               | Ref. chromosomes [#]  | 1                            | 1                             | 1                                 | 1                                  |                    |
|                               | ONT                   | Contigs [#]                  | 1                             | 1                                 | 1                                  | 1                  |
|                               | 30×                   | Aln. bases ref. [bp]         | 48438 (99.87%)                | 48434 (99.86%)                    | 48438 (99.87%)                     | 48434 (99.86%)     |
|                               |                       | Aln. bases query [bp]        | 47916 (100.00%)               | 47872 (100.00%)                   | 47852 (100.00%)                    | 47856 (100%)       |
|                               |                       | Avg. Identity                | 97.59                         | 97.97                             | 97.60                              | 98.02              |
| <i>E. coli</i><br>K-12        | Ref. genome size [bp] | 4641652                      | 4641652                       | 4641652                           | 4641652                            |                    |
|                               | Total bases [bp]      | 4637173                      | 4632058                       | 4634190                           | 4630935                            |                    |
|                               | Ref. chromosomes [#]  | 1                            | 1                             | 1                                 | 1                                  |                    |
|                               | ONT                   | Contigs [#]                  | 1                             | 1                                 | 1                                  | 1                  |
|                               | R7.3                  | Aln. bases ref. [bp]         | 4640867 (99.98%)              | 4641323 (99.99%)                  | 4641016 (99.99%)                   | 4641323 (99.99%)   |
|                               | 54×                   | Aln. bases query [bp]        | 4636689 (99.99%)              | 4632055 (100.00%)                 | 4634187 (100.00%)                  | 4630932 (100.00%)  |
|                               |                       | Avg. Identity                | 99.13                         | 99.32                             | 99.18                              | 99.34              |
| <i>S. cerevisiae</i><br>S288C | Ref. genome size [bp] | 12157105                     | 12157105                      | 12157105                          | 12157105                           |                    |
|                               | Total bases [bp]      | 12172019                     | 12167797                      | 12164303                          | 12163261                           |                    |
|                               | Ref. chromosomes [#]  | 17                           | 17                            | 17                                | 17                                 |                    |
|                               | ONT                   | Contigs [#]                  | 42                            | 42                                | 42                                 | 42                 |
|                               | R9                    | Aln. bases ref. [bp]         | 12104541 (99.57%)             | 12110095 (99.61%)                 | 12104999 (99.57%)                  | 12111938 (99.63%)  |
|                               | 59×                   | Aln. bases query [bp]        | 12108082 (99.48%)             | 12115796 (99.57%)                 | 12101200 (99.48%)                  | 12113024 (99.59%)  |
|                               |                       | Avg. Identity                | 97.88                         | 98.04                             | 97.89                              | 98.02              |
| <i>E. coli</i><br>K-12        | Ref. genome size [bp] | 4641652                      | 4641652                       | 4641652                           | 4641652                            |                    |
|                               | Total bases [bp]      | 4653199                      | 4645508                       | 4650598                           | 4644089                            |                    |
|                               | Ref. chromosomes [#]  | 1                            | 1                             | 1                                 | 1                                  |                    |
|                               | PacBio                | Contigs [#]                  | 1                             | 1                                 | 1                                  | 1                  |
|                               | P6C4                  | Aln. bases ref. [bp]         | 4641501 (100.00%)             | 4641439 (100.00%)                 | 4641501 (100.00%)                  | 4641439 (100.00%)  |
|                               | 160×                  | Aln. bases query [bp]        | 4653111 (100.00%)             | 4645508 (100.00%)                 | 4650536 (100.00%)                  | 4644089 (100.00%)  |
|                               |                       | Avg. Identity                | 99.63                         | 99.90                             | 99.69                              | 99.94              |
| <i>S. cerevisiae</i><br>W303  | Ref. genome size [bp] | 12157105                     | 12157105                      | 12157105                          | 12157105                           |                    |
|                               | Total bases [bp]      | 12071278                     | 12051573                      | 12065231                          | 12047858                           |                    |
|                               | Ref. chromosomes [#]  | 17                           | 17                            | 17                                | 17                                 |                    |
|                               | PacBio                | Contigs [#]                  | 30                            | 30                                | 30                                 | 30                 |
|                               | P4C2                  | Aln. bases ref. [bp]         | 12023607 (98.90%)             | 12025677 (98.92%)                 | 12022784 (98.90%)                  | 12023956 (98.90%)  |
|                               | 127×                  | Aln. bases query [bp]        | 12046299 (99.79%)             | 12027338 (99.80%)                 | 12040526 (99.80%)                  | 12024239 (99.80%)  |
|                               |                       | Avg. Identity                | 99.43                         | 99.72                             | 99.48                              | 99.74              |
| <i>C. elegans</i>             | Ref. genome size [bp] | 100272607                    | 100272607                     | 100272607                         | 100272607                          |                    |
|                               | Total bases [bp]      | 106353704                    | 106392402                     | 106246733                         | 106276277                          |                    |
|                               | Ref. chromosomes [#]  | 6                            | 6                             | 6                                 | 6                                  |                    |
|                               | PacBio                | Contigs [#]                  | 77                            | 77                                | 77                                 | 76                 |
|                               | P6C4                  | Aln. bases ref. [bp]         | 100017898 (99.75%)            | 99979140 (99.71%)                 | 100017956 (99.75%)                 | 99990098 (99.72%)  |
|                               | 81×                   | Aln. bases query [bp]        | 101711974 (95.64%)            | 101741297 (95.63%)                | 101608070 (95.63%)                 | 101638862 (95.64%) |
|                               |                       | Avg. Identity                | 99.44                         | 99.73                             | 99.47                              | 99.77              |
