# Supplementary material for: Fast and accurate de novo genome assembly from long uncorrected reads
Source: PubMed Central journal article supplement — Genome Res. 2017 May;27(5):737–46. doi: 10.1101/gr.214270.116 (PMC5411768; doi:10.1101/gr.214270.116), 2017-05
Supplement: supp_gr.214270.116_Supplemental_Table_S2.pdf [file supp_gr.214270.116_Supplemental_Table_S2.pdf]

**Supplemental Table S2. Resource consumption of the Miniasm+Racon pipeline with (ovl) and without overlapping windows (default) on all datasets. Results are presented in the format „CPU time [min] / Maximum memory [GB]“.**

|                                            | <b>Miniasm+Racon</b> | <b>Miniasm+Racon</b> | <b>Miniasm+Racon ovl.</b> | <b>Miniasm+Racon ovl.</b> |
|--------------------------------------------|----------------------|----------------------|---------------------------|---------------------------|
|                                            | <b>1 iteration</b>   | <b>2 iterations</b>  | <b>1 iteration</b>        | <b>2 iterations</b>       |
| <i>Lambda</i> ONT 30×                      | 0.12 / < 0.1         | 0.25 / < 0.1         | 0.18 / < 0.1              | 0.33 / < 0.1              |
| <i>E. coli</i> K-12 ONT R7.3 54×           | 25 / 3.32            | 46 / 3.32            | 29 / 3.31                 | 54 / 3.31                 |
| <i>S. cerevisiae</i> S288C ONT R9 59×      | 28 / 7.84            | 44 / 7.84            | 30 / 7.82                 | 47 / 7.81                 |
| <i>E. coli</i> K-12 PacBio P6C4 160×       | 86 / 9.69            | 162 / 9.69           | 100 / 9.77                | 190 / 9.77                |
| <i>S. cerevisiae</i> W303 PacBio P4C2 127× | 115 / 16.09          | 215 / 16.09          | 131 / 16.04               | 251 / 16.04               |
| <i>C. elegans</i> PacBio P6C4 81×          | 1247 / 50.38         | 2004 / 50.38         | 1405 / 49.40              | 2289 / 49.40              |
