# Supplementary material for: Fast and accurate de novo genome assembly from long uncorrected reads
Source: PubMed Central journal article supplement — Genome Res. 2017 May;27(5):737–46. doi: 10.1101/gr.214270.116 (PMC5411768; doi:10.1101/gr.214270.116), 2017-05
Supplement: supp_gr.214270.116_Supplemental_Table_S3.pdf [file supp_gr.214270.116_Supplemental_Table_S3.pdf]

**Supplemental Table S3. Comparison of error-correction modules on *E. coli* K-12 R7.3 54× dataset between Racon with (ovl) and without overlapping windows. Values presented in the table are median values of the error and match rate estimates.**

|                   | CPU time [h] | Coverage | Insertion rate (%) | Deletion rate (%) | Mismatch rate (%) | Match rate (%) | Error rate (I+D+M) (%) |
|-------------------|--------------|----------|--------------------|-------------------|-------------------|----------------|------------------------|
| <b>Raw</b>        | -            | 53.55×   | 5.23               | 2.83              | 4.89              | 89.81          | 12.95                  |
| <b>Racon</b>      | 10           | 50.23×   | 0.52               | 0.58              | 0.23              | 99.25          | 1.33                   |
| <b>Racon ovl.</b> | 12           | 50.24×   | 0.53               | 0.58              | 0.24              | 99.18          | 1.35                   |
