# Supplementary material for: Fast and accurate de novo genome assembly from long uncorrected reads
Source: PubMed Central journal article supplement — Genome Res. 2017 May;27(5):737–46. doi: 10.1101/gr.214270.116 (PMC5411768; doi:10.1101/gr.214270.116), 2017-05
Supplement: supp_gr.214270.116_Supplemental_Table_S4.pdf [file supp_gr.214270.116_Supplemental_Table_S4.pdf]

## Supplemental Table S4. Configuration parameters used for running Falcon on PacBio datasets.

```
[General]
job_type = local
input_fofn = input.fofn
input_type = raw
length_cutoff = 1000
length_cutoff_pr = 1000

jobqueue = your_queue
sge_option_da =
sge_option_la =
sge_option_pda =
sge_option_pla =
sge_option_fc =
sge_option_cns =

pa_concurrent_jobs = 24
ovlp_concurrent_jobs = 24

pa_HPCdaligner_option = -v -da14 -t16 -e.70 -l1000 -s1000
ovlp_HPCdaligner_option = -v -da14 -t32 -h60 -e.96 -l500 -s1000

pa_DBsplit_option = -x500 -s50
ovlp_DBsplit_option = -x500 -s50
falcon_sense_option = --output_multi --min_idt 0.70 --min_cov 4 --local_match_count_threshold
2 --max_n_read 200 --n_core 12
overlap_filtering_setting = --max diff 100 --max cov 100 --min cov 10 --bestn 10 --n_core 12
```
