# Supplementary material for: Fast and accurate de novo genome assembly from long uncorrected reads
Source: PubMed Central journal article supplement — Genome Res. 2017 May;27(5):737–46. doi: 10.1101/gr.214270.116 (PMC5411768; doi:10.1101/gr.214270.116), 2017-05
Supplement: supp_gr.214270.116_Supplemental_Table_S5.pdf [file supp_gr.214270.116_Supplemental_Table_S5.pdf]

## Supplemental Table S5. Configuration parameters used for running Falcon on ONT datasets.

```
[General]
job_type = local
input_fofn = input.fofn
input_type = raw
length_cutoff = 1000
length_cutoff_pr = 1000

jobqueue = your_queue
sge_option_da =
sge_option_la =
sge_option_pda =
sge_option_pla =
sge_option_fc =
sge_option_cns =

pa_concurrent_jobs = 24
ovlp_concurrent_jobs = 24

pa_HPCdaligner_option = -v -da14 -t100 -e.70 -l100 -s100
ovlp_HPCdaligner_option = -v -da14 -t100 -h60 -e.92 -l100 -s100

pa_DBsplit_option = -x100 -s50
ovlp_DBsplit_option = -x100 -s50
falcon_sense_option = --output_multi --min_idt 0.50 --local_match_count_threshold 0 --
max_n_read 200 --n_core 12
overlap_filtering_setting = --max diff 100 --max cov 100 --min cov 5 --bestn 20 --n core 12
```
